1 **Title:** Musculoskeletal Advertising Focuses on Whites and Overlooks Minority  
2 Communities

3

4 **Authors:**

5 Kelsey A. Rankin, B.A.<sup>1</sup>

6 Robert John Oris, B.S.<sup>1</sup>

7 Adithi Wijesekera<sup>1</sup>, High School Diploma Candidate

8 Daniel H. Wiznia, M.D.<sup>1</sup>

9

10 **Affiliations:** <sup>1</sup>Yale School of Medicine, New Haven, CT USA 06510

11

12 **Conflict of interest:** The authors report no conflicts of interest.

13

14 **Corresponding author:**

15 Kelsey Rankin

16 Yale School of Medicine, New Haven, CT USA

17 [kelsey.rankin@yale.edu](mailto:kelsey.rankin@yale.edu)

18 **Abstract**

19 *Introduction*

20 Demographic disparities in musculoskeletal (MSK) health exist in the US. Racial  
21 representation in advertising has been shown to influence buying patterns. By focusing  
22 advertising toward majority groups, direct-to-consumer advertising may exacerbate MSK  
23 disparities by neglecting underrepresented minorities. To better understand how race is  
24 represented across MSK advertisements and how this may influence patterns in MSK  
25 health, we reviewed advertisements in popular magazines, using online databases for  
26 collection.

27

28 *Methods*

29 8 magazine types were chosen. Racial distribution was analyzed using Pearson's chi-  
30 squared and chi-squared goodness of fit tests. Fisher's exact test was used when >20%  
31 of cells had  $n < 5$ . Significance was set at  $p < 0.05$ .

32

33 *Results*

34 Of advertisements that featured a model, white models were overrepresented ( $p < 0.001$ ),  
35 and Hispanic and Asian models were underrepresented ( $p < 0.001$ ). Only 7.3% of  
36 advertisements featured multiple models of different races or ethnicities, while 92.7% did  
37 not. African American models were overrepresented as athletes ( $p < 0.001$ ) and  
38 underrepresented in pain relief ads ( $p < 0.001$ ).

39

40 *Discussion*

41 There is poor representation of minorities in MSK advertisements. Even when controlling  
42 for US population demographics, white models were overrepresented, and models of  
43 minority races are underrepresented. African American models were typecast as athletes  
44 and underrepresented in pain relief ads.

45

46 **Key words:** Racial disparities; direct-to-consumer advertising; musculoskeletal health.

47 **Introduction**

48 Racial and ethnic disparities in musculoskeletal (MSK) health exist in the U.S. The  
49 prevalence of hip and knee osteoarthritis is highest among African Americans and  
50 Hispanics [1-5]. African Americans have the highest burden of hip and knee osteoarthritis  
51 [2-4], as well as disproportionately high losses of quality-adjusted life years (QALYs), due  
52 to osteoarthritis [6].

53

54 Racial and ethnic differences in food insecurity [8], access to health-promoting foods [9],  
55 and engagement in exercise and healthy eating [10] exist in the U.S., and are likely  
56 contributory factors to these observed differences in MSK health.

57

58 Direct-to-consumer advertising represents an important means of exposure to health  
59 promoting products. It has been shown that racial minorities, including African Americans  
60 and Hispanics, have been historically underrepresented in advertising [11, 12].  
61 Representation of African American models in magazine advertisements is increasing,  
62 but is skewed toward depicting African American models as athletes or musicians [11].

63

64 In addition, it has been shown that the race of models used in advertisements influences  
65 buying patterns: individuals are more likely to make a purchasing decision if they identify  
66 with the race and/or ethnicity of the model [13-19]. Magazines aimed at African American  
67 and Hispanic populations have been shown to display significantly fewer health-  
68 promoting advertisements and more health diminishing advertisements [20].

69

70 Examining racial diversity in MSK magazine advertising has important implications for  
71 product utilization and health disparities. The extent to which advertisements that promote  
72 musculoskeletal health are aimed at minority populations is unknown. This study aims to  
73 examine whether racial and ethnic disparities exist in MSK magazine advertising, to  
74 support a better understanding of how more diverse advertisement content may improve  
75 MSK disparities.

76 **Methods**

77 *Study design*

78 Advertisements relating to MSK health were collected from magazines, both digital and  
79 print. The following definition was developed to identify an MSK health advertisement:  
80 any advertisement whose product or service would benefit an individual's orthopedic  
81 health (skeletal, cardiac, muscular, or nutritional). The following databases were used to  
82 obtain magazine content: RBDigital, ZINIO magazine database, *Magzter*, and Amazon.

83

84 Data was obtained from the eight following magazine types: women's health, men's  
85 health, food/dietary health, elderly health, sports health, general lifestyle, African  
86 American health, and Hispanic health. Each magazine type was populated with three  
87 magazines. The magazines chosen for each type were based on the highest number of  
88 subscriptions and accessibility to one complete year's worth of issues from the above  
89 databases. A June 2019 industry whitepaper from the Alliance of Audited Media was  
90 utilized to determine magazines with the greatest subscription counts [23]. A complete list  
91 of magazine titles for each magazine type is included in Supplemental Table 1.

92

93 One year's worth of magazines was examined, with the primary time frame being  
94 January-December 2019. However, within the four magazine sources that were utilized,  
95 not all magazines were available for the complete year 2019. When issues were not  
96 available for 2019, magazines were supplemented with issues from the corresponding  
97 month from the year 2020. The majority of the magazines had a monthly publishing  
98 frequency. However, *Black EOE Journal* published triannually; *Runner's World* and *Taste*

99 *of Home* published bimonthly; *The New Yorker*, *Woman's World*, *Vanidades Mexico* and  
100 *Sports' Illustrated* published weekly; *Saber Vivir Ar* published biweekly. For the  
101 magazines with weekly, biweekly, and fortnightly issues, the first issue of the month was  
102 chosen.

103

#### 104 *Data collection*

105 For each issue, the following information was recorded: magazine title, magazine type,  
106 issue, page number the advertisement was found on, advertisement category, product  
107 name, size of the advertisement, description of the model(s) in the advertisement if  
108 applicable (including number of models, gender, age, and race of model(s)), presence of  
109 a celebrity, magazine frequency, and number of monthly subscriptions. The advertising  
110 categories were recorded as exercise, fitness/exercise clothing, fitness/exercise  
111 equipment, health food, pain relief, supplements, diet, health insurance, weight loss  
112 programs, sports drink, medical establishment (diagnostic center), medical procedure,  
113 and medical equipment. If a certain advertisement product overlapped between two of  
114 the above advertisement categories, then the category that was primarily featured in the  
115 advertisement was chosen.

116

117 The 24 magazines were each reviewed independently by two individuals (AW, RO).  
118 Consensus was obtained by the examiners. If consensus was not reached, a third  
119 examiner (DW) was utilized to reach a final determination.

120

#### 121 *US demographics*

122 US racial demographics were used to control for racial variation in candidate analyses.  
123 Racial breakdowns were as follows: non-Hispanic White: 60.1%; non-Hispanic African  
124 American: 13.4%; Hispanic: 18.5%; Asian: 5.9%; Mixed race: 2.8% [24].

125

### 126 *Statistical analyses*

127 Categorical variables were analyzed using Pearson's chi-squared tests. When >20% of  
128 cells had expected frequencies <5, Fisher's exact test was used. For intra-ad categories  
129 and intra-magazine type analyses, unknown race was dropped, and chi-squared  
130 Goodness of Fit tests were used. Goodness of fit analyses used distribution of current US  
131 racial demographics (see above). Only analyses with  $n \geq 10$  were reported on and  
132 considered. Statistical analyses were performed using Stata v.16.1 and graphs were  
133 created using GraphPad Prism 7.0. Statistical significance was defined as  $p < 0.05$ .



134 **Results**

135 *MSK advertisements display demographic differences*

136 A total of 1,617 MSK advertisements were identified. 832 (51.5%) advertisements did not  
137 display an identifiable model. Of the 785 ads with models, 538 (68.5%) featured a white  
138 model, 138 (17.6%) featured an African American model, 22 (2.8%) featured a Hispanic  
139 model, 10 (1.3%) featured an Asian model, 53 (6.8%) featured a model of mixed race,  
140 and 24 (3.1%) featured a model of unknown race or ethnicity (Table 1). This deviated  
141 significantly from US demographics ( $p < 0.001$ ). 57 (7.3%) featured multiple models of  
142 different races or ethnicities, while 728 (92.7%) did not (Table 1). Overall, white models  
143 were featured significantly more frequently than African American, Hispanic, and mixed  
144 race/ethnicity models (all  $p < 0.001$ ).

145

146

147 *Racial demographics of model by MSK advertisement category*

148 Significant differences in race/ethnicity were observed by MSK ad category ( $p < 0.001$ )  
149 (Table 5). In all categories, white models were significantly overrepresented, apart from  
150 sports drink and health insurance advertisements, where they were underrepresented (all  
151  $p < 0.001$ , medical equipment  $p = 0.037$ ) (Table 6). African American models were  
152 overrepresented in health food, sports drinks, and fitness/exercise clothing, and  
153 underrepresented across pain relief and supplements (Table 6). Hispanic models were  
154 underrepresented across all ad categories (Table 6). Asian models had little to no  
155 representation, and were underrepresented across all categories (Table 6). Mixed race  
156 models were overrepresented in exercise, exercise and fitness clothing, equipment, pain  
157 relief, supplement, diet, and sport drink advertisements (Table 6).

158 **Discussion**

159 In the U.S., significant racial and ethnic disparities exist in MSK health, as evidenced by  
160 differences in rates of obesity, hip and knee osteoarthritis, severe joint pain, and lost  
161 QALYs [1-7, 25]. Direct-to-consumer advertising is highly influential in minority  
162 communities [21, 22], and race portrayal in advertising has been shown to affect customer  
163 perception, favorability, and buying patterns [13-19, 21, 22]. It has been demonstrated  
164 that African Americans and Hispanics are underrepresented in health-promoting  
165 magazine advertisements [11, 12, 20, 22, 26]. If this lack of diversity also exists in MSK  
166 magazine advertising, a shift in representation could be an important mechanism to  
167 reduce disparities in MSK health. To this end, we sought to examine racial and ethnic  
168 representation in MSK advertisements. We collected data from 24 magazines across 8  
169 magazine types.

170

171 Our study is limited by the difficulty and subjective nature of identifying models by  
172 race/ethnicity. For example, differentiating between hair color, facial features and skin  
173 color can sometimes be ambiguous. However, the impact of this ambiguity was mitigated  
174 by utilizing 2 independent racially diverse reviewers and adjudicating disagreements by  
175 a third reviewer. Additionally, this subjectivity in identifying models by race/ethnicity is also  
176 present when a viewer is exposed to an advertisement.

177

178 Overall, we found unbalanced racial representation across all MSK advertisements. We  
179 found that white models were represented significantly more than all other races, and that  
180 this representation proportionately deviated from US demographics. Despite white

181 populations having lower rates of obesity [5], food insecurity [8], osteoarthritis [1-5], and  
182 overall better general health, white individuals were the most targeted audience for MSK  
183 products, even when adjusting for US racial demographics. We also found that white  
184 models were overrepresented in all ad categories, apart from sports drink and health  
185 insurance advertisements, where they were underrepresented.

186  
187 In terms of African American models, they were overrepresented in sports drink  
188 advertisements and in sports health magazines. This reinforces previous literature,  
189 demonstrating the skewed presentation of African Americans as athletes [11]. This  
190 narrow representation may serve to further reduce the target audience for MSK  
191 advertisements in the African American community, perpetuating stereotypes and  
192 disparities. In addition, we found African American models were underrepresented across  
193 pain relief advertisements. Racial disparities in pain management advertising are  
194 concerning, given healthcare's historical and current underdiagnoses of pain and  
195 treatment biases in the African American community [28, 29].

196  
197 In terms of a positive and encouraging findings, health food and health insurance were  
198 two ad categories in which African Americans were over-represented, and these may  
199 potentially have a positive impact in addressing African American healthcare disparities.  
200 The increased inclusion of African American models in health food advertisements may  
201 serve to address high levels of food insecurity in African American communities. In  
202 addition, the increased representation in health insurance advertisements is also positive,  
203 given the racial disparities that exist as it pertains to health insurance coverage. As African

204 American and Hispanic individuals have lower rates of health insurance coverage than  
205 non-Hispanic White individuals [27], this overrepresentation in insurance advertisements  
206 can be seen to be appropriately targeting a population in need, and a strategy that can  
207 be emulated in other categories.

208

209 Potential avenues to increase diversity include encouraging advertisers who did not utilize  
210 models to include a racially diverse model through hiring. For example, more than half of  
211 MSK advertisements did not have any model featured or displayed. This represents a  
212 straightforward actionable opportunity in which current ads without models could be  
213 revised to include models. Another alternative is to increase diversity in hiring of models  
214 in companies that utilized a disproportionate number of white models. Additionally,  
215 magazine publishers could provide guidance in terms of which populations would best  
216 benefit from learning about certain advertisement categories, encouraging advertisers to  
217 feature more minority models and target minority audiences. This may be an important  
218 step towards improving the observed racial and ethnic disparities in MSK health.

219

## 220 **Acknowledgements**

221 N/A

222 **References**

- 223 1. Allen, K.D., Racial and ethnic disparities in osteoarthritis phenotypes. *Curr Opin*  
224 *Rheumatol*, 2010. 22(5): p. 528-32.
- 225 2. Dillon, C.F., et al., Prevalence of knee osteoarthritis in the United States: arthritis data  
226 from the Third National Health and Nutrition Examination Survey 1991-94. *J Rheumatol*,  
227 2006. 33(11): p. 2271-9.
- 228 3. Nelson, A.E., et al., Characterization of individual radiographic features of hip  
229 osteoarthritis in African American and White women and men: the Johnston County  
230 Osteoarthritis Project. *Arthritis Care Res (Hoboken)*, 2010. 62(2): p. 190-7.
- 231 4. Sowers, M., et al., Radiographically defined osteoarthritis of the hand and knee in  
232 young and middle-aged African American and Caucasian women. *Osteoarthritis*  
233 *Cartilage*, 2000. 8(2): p. 69-77.
- 234 5. Wright, N.C., et al., Self-reported osteoarthritis, ethnicity, body mass index, and other  
235 associated risk factors in postmenopausal women-results from the Women's Health  
236 Initiative. *J Am Geriatr Soc*, 2008. 56(9): p. 1736-43.
- 237 6. Losina, E., et al., Impact of obesity and knee osteoarthritis on morbidity and mortality  
238 in older Americans. *Ann Intern Med*, 2011. 154(4): p. 217-26.
- 239 7. Vaccaro, J.A. and F.G. Huffman, Sex and Race/Ethnic Disparities in Food Security and  
240 Chronic Diseases in U.S. Older Adults. *Gerontol Geriatr Med*, 2017. 3: p.  
241 2333721417718344.
- 242 8. Larson, N.I., M.T. Story, and M.C. Nelson, Neighborhood environments: disparities in  
243 access to healthy foods in the U.S. *Am J Prev Med*, 2009. 36(1): p. 74-81.

- 244 9. August, K.J. and D.H. Sorkin, Racial/ethnic disparities in exercise and dietary behaviors  
245 of middle-aged and older adults. *J Gen Intern Med*, 2011. 26(3): p. 245-50.
- 246 10. Bowen L and S. J, Minority Presence and Portrayal in Mainstream Magazine  
247 Advertising: An Update. *Journalism & Mass Communication*, 1997. 74(1): p. 134-146.
- 248 11. Plous, S. and D. Neptune, Racial and Gender Biases in Magazine Advertising: A  
249 ContentAnalytic Study. *Psychology of Women Quarterly*, 1997. 21(4).
- 250 12. Appiah, O., Black, White, Hispanic, and Asian American Adolescents' Responses to  
251 Culturally Embedded Ads. *Howard Journal of Communication*, 2001. 12(1): p. 29-48.
- 252 13. Bush, R.F., R.F. Gwinner, and P.J. Solomon, White Consumer Sales Response to  
253 Black Models. *Journal of Marketing*, 1974. 38(2): p. 25-29.
- 254 14. Chaiken, S., Heuristic versus Systematic Information Processing and the Use of  
255 Source versus Message Cues in Persuasion. *Journal of Personality and Social  
256 Psychology*, 1980. 39(5): p. 752-766.
- 257 15. Cui, G., Marketing Strategies in a Multi-Ethnic Environement. *Journal of Marketing  
258 Theory and Practice*, 1997. 5(1): p. 122-134.
- 259 16. Davis, J.L. and O.H. Gandy, Racial Identity and Media Orientation: Exploring the  
260 Nature of Constraint. *Journal of Black Studies*, 1999. 29(3): p. 367-397.
- 261 17. Deshpande, R., W.D. Hoyer, and N. Donthu, The Intensity of Ethnic Affiliation: A Study  
262 of the Sociology of Hispanic Consumption. *Journal of Consumer Research*, 1986. 13(2):  
263 p. 214-220.
- 264 18. Grier, S.A., A.M. Brumbaugh, and C.G. Thornton, Crossover Dreams: Consumer  
265 Responses to Ethnic-Oriented Products. *Journal of Marketing*, 2006. 70(2): p. 35-51.

- 266 19. Duerksen, S.C., et al., Health disparities and advertising content of women's  
267 magazines: a cross-sectional study. *BMC Public Health*, 2005. 5: p. 85.
- 268 20. Media, A.o.A., Circulation Report. 2019.
- 269 21. Bureau, U.S.C., Quick Facts: United States. 2021.
- 270 22. Kulkarni, K., et al., Obesity and osteoarthritis. *Maturitas*, 2016. 89: p. 22-8.
- 271 23. Prevention, C.f.D.C.a., Racial/ethnic differences in the prevalence and impact of  
272 doctor diagnosed arthritis. *MMWR*, 2005. 54(5): p. 119-123.
- 273 24. Aaker, J.L., A.M. Brumbaugh, and S.A. Grier, Nontarget Markets and Viewer  
274 Distinctiveness: The Impact of Target Marketing on Advertising Attitudes. *Journal of*  
275 *Consumer Psychology*, 2000. 9(3): p. 127-140.
- 276 25. Lee, D. and C.E. Begley, Racial and ethnic disparities in response to direct-to-  
277 consumer advertising. *Am J Health Syst Pharm*, 2010. 67(14): p. 1185-90.
- 278 26. Wiznia, L.E., et al., Deficiency of sun protection advertising exists in consumer  
279 magazines across demographic groups and varies by target demographic. *J Am Acad*  
280 *Dermatol*, 2019. 80(4): p. 1139-1141.
- 281 27. Hoffman, K.M., et al., Racial bias in pain assessment and treatment  
282 recommendations, and false beliefs about biological differences between blacks and  
283 whites. *Proc Natl Acad Sci U S A*, 2016. 113(16): p. 4296-301.
- 284 28. Maina, I.W., et al., A decade of studying implicit racial/ethnic bias in healthcare  
285 providers using the implicit association test. *Soc Sci Med*, 2018. 199: p. 219-229.
- 286 29. Artiga, S., K. Orgera, and A. Damico, Changes in Health Coverage by Race and  
287 Ethnicity since the ACA, 2010-2018, . Kaiser Family Foundation, 2020.

## Tables

**Table 1: Magazine and ad characteristics**

| Variable                       | Number MSK ads across 3 magazines/type; N (%) |
|--------------------------------|-----------------------------------------------|
| <b>Magazine type</b>           |                                               |
| Senior Health                  | 131 (8.11%)                                   |
| Women's Health                 | 352 (21.78%)                                  |
| Sports Health                  | 401 (24.81%)                                  |
| Men's Health                   | 355 (21.97%)                                  |
| Food/Dietary Health            | 85 (5.26%)                                    |
| General Lifestyle              | 211 (13.06%)                                  |
| African American Health        | 12 (0.74%)                                    |
| Hispanic Health                | 69 (4.27%)                                    |
| <b>Ad category</b>             |                                               |
| Exercise                       | 173 (10.71%)                                  |
| Fitness/Exercise Clothing      | 250 (15.47%)                                  |
| Fitness/Exercise Equipment     | 237 (14.67%)                                  |
| Health Food                    | 264 (16.34%)                                  |
| Pain Relief                    | 150 (9.28%)                                   |
| Supplements                    | 225 (13.92%)                                  |
| Diet                           | 199 (12.31%)                                  |
| Health Insurance               | 19 (1.18%)                                    |
| Weight Loss Program            | 13 (0.80%)                                    |
| Sports Drink                   | 62 (3.84%)                                    |
| Medical Establishment          | 6 (0.37%)                                     |
| Medical Procedure              | 2 (0.12%)                                     |
| Medical Equipment              | 16 (0.99%)                                    |
| <b>Featured model</b>          |                                               |
| Model                          | 785 (48.55%)                                  |
| No model                       | 832 (51.45%)                                  |
| <b>Multiple races in ad</b>    |                                               |
| Yes                            | 57 (3.53%)                                    |
| No                             | 1,560 (96.47%)                                |
| <b>Different genders in ad</b> |                                               |
| Yes                            | 133 (8.23%)                                   |
| No                             | 1,483 (91.71%)                                |
| Unknown                        | 1 (0.06%)                                     |
| <b>Race of model</b>           |                                               |
| Black                          | 138 (17.58%)                                  |
| Hispanic                       | 22 (2.80%)                                    |
| Asian                          | 10 (1.27%)                                    |
| Mixed                          | 53 (6.75%)                                    |
| White                          | 538 (68.54%)                                  |
| Unknown or N/A                 | 24 (3.06%)                                    |
| <b>Featured gender</b>         |                                               |
| Female                         | 434 (55.29%)                                  |
| Male                           | 287 (36.56%)                                  |
| Unknown or N/A                 | 1 (0.13%)                                     |
| Both                           | 63 (8.03%)                                    |



| <b>Featured gender and race</b> |              |
|---------------------------------|--------------|
| White Men                       | 196 (11.88%) |
| White Women                     | 313 (18.97%) |
| Black Men                       | 50 (3.03%)   |
| Black Women                     | 64 (3.88%)   |
| Hispanic Men                    | 12 (0.73%)   |
| Hispanic Women                  | 6 (0.36%)    |
| Asian Men                       | 4 (0.24%)    |
| Asian Women                     | 5 (0.30%)    |
| Mixed Race Men                  | 15 (0.91%)   |
| Mixed Race Women                | 36 (2.18%)   |
| Unknown or none                 | 949 (57.52%) |

**Table 2: Differences in race of model by MSK ad category**

| Variable                   | N (%)       |            |          |           |            |            | p-value          |
|----------------------------|-------------|------------|----------|-----------|------------|------------|------------------|
|                            | White       | Hispanic   | Asian    | Mixed     | Black      | Unknown    |                  |
| <b>Ad category</b>         |             |            |          |           |            |            | <b>&lt;0.001</b> |
| Exercise                   | 93 (67.9%)  | 10 (7.3%)  | 2 (1.5%) | 11 (8.0%) | 17 (12.4%) | 4 (2.9%)   |                  |
| Fitness/Exercise Clothing  | 97 (72.9%)  | 2 (2.3%)   | 3 (2.3%) | 7 (5.3%)  | 21 (15.8%) | 3 (2.3%)   |                  |
| Fitness/Exercise Equipment | 67 (75.3%)  | 2 (2.3%)   | 3 (3.4%) | 8 (9.0%)  | 9 (10.1%)  | 0 (0.0%)   |                  |
| Health Food                | 49 (69.0%)  | 0 (0.0%)   | 0 (0.0%) | 1 (1.4%)  | 17 (23.9%) | 4 (5.6%)   |                  |
| Pain Relief                | 53 (85.5%)  | 0 (0.0%)   | 1 (1.6%) | 3 (4.8%)  | 4 (6.5%)   | 1 (1.6%)   |                  |
| Supplement                 | 96 (81.4%)  | 2 (1.7%)   | 1 (0.9%) | 11 (9.3%) | 7 (5.9%)   | 1 (0.9%)   |                  |
| Diet                       | 61 (78.2%)  | 1 (1.3%)   | 0 (0.0%) | 8 (10.3%) | 8 (10.3%)  | 0 (0.0%)   |                  |
| Health Insurance           | 7 (41.2%)   | 0 (0.0%)   | 0 (0.0%) | 0 (0.0%)  | 10 (58.8%) | 0 (0.0%)   |                  |
| Weight Loss Program        | 2 (25.0%)   | 0 (0.0%)   | 0 (0.0%) | 0 (0.0%)  | 6 (75.0%)  | 0 (0.0%)   |                  |
| Sports Drink               | 0 (0.0%)    | 0 (0.0%)   | 0 (0.0%) | 4 (7.4%)  | 39 (72.2%) | 11 (20.4%) |                  |
| Medical Establishment      | 0 (0.0%)    | 5 (100.0%) | 0 (0.0%) | 0 (0.0%)  | 0 (0.0%)   | 0 (0.0%)   |                  |
| Procedure                  | 2 (100.0%)  | 0 (0.0%)   | 0 (0.0%) | 0 (0.0%)  | 0 (0.0%)   | 0 (0.0%)   |                  |
| Medical Equipment          | 10 (100.0%) | 0 (0.0%)   | 0 (0.0%) | 0 (0.0%)  | 0 (0.0%)   | 0 (0.0%)   |                  |

Bold indicates statistical significance, set at p<0.05.

**Table 3: Observed frequencies of racial distribution within MSK ad categories differ from US demographic distribution**

| Variable                   | Observed frequency; expected frequency |          |        |         |          | p-value          |
|----------------------------|----------------------------------------|----------|--------|---------|----------|------------------|
|                            | White                                  | Hispanic | Asian  | Mixed   | Black    |                  |
| <b>Ad category</b>         |                                        |          |        |         |          |                  |
| Exercise                   | 93; 79.9                               | 10; 24.6 | 2; 7.9 | 11; 3.7 | 17; 17.8 | <b>&lt;0.001</b> |
| Fitness/Exercise Clothing  | 97; 78.1                               | 2; 24.1  | 3; 7.7 | 7; 3.6  | 21; 17.4 | <b>&lt;0.001</b> |
| Fitness/Exercise Equipment | 67; 53.5                               | 2; 16.5  | 3; 5.3 | 8; 2.5  | 9; 11.9  | <b>&lt;0.001</b> |
| Health Food                | 49; 40.3                               | 0; 12.4  | 0; 4.0 | 1; 1.9  | 17; 9.0  | <b>&lt;0.001</b> |
| Pain Relief                | 53; 36.7                               | 0; 11.3  | 1; 3.6 | 3; 1.8  | 4; 8.2   | <b>&lt;0.001</b> |
| Supplement                 | 96; 70.3                               | 2; 21.7  | 1; 6.9 | 11; 3.3 | 7; 15.7  | <b>&lt;0.001</b> |
| Diet                       | 61; 46.9                               | 1; 14.4  | 0; 4.6 | 8; 2.2  | 8; 10.5  | <b>&lt;0.001</b> |
| Health Insurance           | 7; 10.2                                | 0; 3.2   | 0; 1.0 | 0; 0.5  | 10; 2.3  | <b>&lt;0.001</b> |
| Weight Loss Program*       | 2; 4.8                                 | 0; 1.5   | 0; 0.5 | 0; 0.2  | 6; 1.1   | <b>&lt;0.001</b> |
| Sports Drink               | 0; 25.8                                | 0; 8.0   | 0; 2.5 | 4; 1.2  | 39; 5.8  | <b>&lt;0.001</b> |
| Medical Establishment*     | 0; 3.0                                 | 5; 0.9   | 0; 0.3 | 0; 0.1  | 0; 0.7   | <b>&lt;0.001</b> |
| Procedure*                 | 2; 1.2                                 | 0; 0.4   | 0; 0.1 | 0; 0.1  | 0; 0.3   | 0.728            |
| Medical Equipment          | 10; 6.0                                | 0; 1.9   | 0; 0.6 | 0; 0.3  | 0; 1.3   | <b>0.037</b>     |

\*n<10 so no significant statistical conclusions could be drawn. Bold indicates statistical significance, set at p<0.05.
